# Supplementary material for: Nitric Oxide Is Required for Melatonin-Enhanced Tolerance against Salinity Stress in Rapeseed (Brassica napus L.) Seedlings
Source: PubMed Central journal article supplement (PMC6073977; doi:10.3390/ijms19071912), 2018-06-29
Supplement: ijms-19-01912-s001.pdf [file ijms-19-01912-s001.pdf]

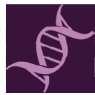

Article

# Nitric Oxide Is Required for Melatonin-Enhanced Tolerance against Salinity Stress in Rapeseed (*Brassica napus* L.) Seedlings

Gan Zhao <sup>1</sup>, Yingying Zhao <sup>1</sup>, Xiuli Yu <sup>1</sup>, Felix Kiprotich <sup>1</sup>, Han Han <sup>1</sup>, Rongzhan Guan <sup>2</sup>, Ren Wang <sup>3</sup> and Wenbiao Shen <sup>1,\*</sup>

**Supplementary Table 1** The sequences of primers for qPCR used in rapeseed.

| Primer name     | Accession number | Sequence (5'→3')                                        |
|-----------------|------------------|---------------------------------------------------------|
| <i>Actin</i>    | AF111812         | F: CTGACCGTATGAGCAAAG<br>R: CCACCGAACCAGAAGGCAGA        |
| <i>GAPDH</i>    | FJ529282         | F: TTGGTGACAACAGGTCAAGCA<br>R: AAACCTGTCGCTCAATGCAATC   |
| <i>NHX1</i>     | AY189676         | F: CAATGCAGGGTTTCAAGTA<br>R: AGTCAAAGGTCCCAATGTC        |
| <i>SOS2</i>     | AY310413         | F: CCAGAGGTACTTAATGGCCAAG<br>R: GTGGCCTTGACTGAACAATGTA  |
| <i>APX</i>      | HE574697         | F: GAGAAATACGCTGCTGATGAAGA<br>R: CCTACCCGAGCTCAGAAAGC   |
| <i>MnSOD</i>    | EF634058         | F: TTGGTTCCTCTGGTGGGTATAGA<br>R: CAGATAATCCGGCCTCACATTC |
| <i>Cu/ZnSOD</i> | AY970822         | F: CCAACGTCCACGCTGATAAGA<br>R: ACAGGTCCTATAGCCGTTGCA    |

**Supplementary Table 2** The sequences of primers for qPCR used in Arabidopsis.

| Primer name    | Accession number | Sequence (5'→3')                                           |
|----------------|------------------|------------------------------------------------------------|
| <i>Actin 2</i> | At3g18780        | F: ACAACCGGTATTGTGCTGGA<br>R: GAAGACGGAGGATGGCATGA         |
| <i>GAPDH</i>   | At1g13440        | F: TTGGTGACAACAGGTCAAGCA<br>R: AAACCTGTCGCTCAATGCAATC      |
| <i>SOS1</i>    | At2g01980        | F: TGCTTGATGAGGGCAGAATA<br>R: ACTTGCGTGGGACAACCTTTA        |
| <i>SOS2</i>    | At5g35410        | F: TAGCGGAGAATGTAGAGAGAAAT<br>R: TGCTGTCGCTGTCAAATAG       |
| <i>SOS3</i>    | At5g24270        | F: TGATTGAAGTAATGGTGGATAAGGC<br>R: AGTCATGTTCTTGATGAGCGATG |
| <i>APX1</i>    | At1g07890        | F: CTCTGGGACGATGCCACAAG<br>R: CTCGACCAAAGGACGGAAAA         |
| <i>APX2</i>    | At3g09640        | F: GTTCAGGATTCGAGGGTGC<br>R: GAAGAGCCTTGTCGGTTGGT          |
| <i>CAT</i>     | At1g20630        | F: TTCCTGTATTCTTCGTCGG<br>R: GCCTTCCATGTGCCCTGTAGT         |
| <i>FSD1</i>    | At495100         | F: AACCAGGTGGTGGAGGAA<br>R: GTAAGCAATGGGAAAGAGCC           |

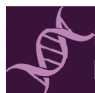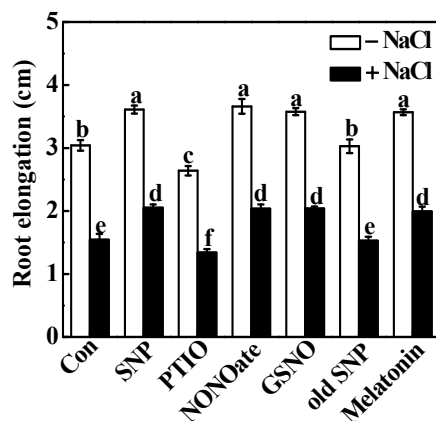

**Figure S1.** NaCl-induced inhibition of root elongation was rescued by three types of NO-releasing compounds, but aggravated by the scavenger of NO. Three-day-old rapeseed seedlings were pretreated with 10  $\mu$ M SNP, 200  $\mu$ M 2-phenyl-4,4,5,5-tetramethylimidazole-1-oxyl-3-oxide (PTIO; a scavenger of NO), 10  $\mu$ M diethylamine NONOate (NONOate; a NO donor), 10  $\mu$ M *S*-nitrosoglutathione (GSNO; a NO donor), 200  $\mu$ M old SNP (a negative control of SNP), and 1  $\mu$ M melatonin for 12 h, and then transferred to 200 mM NaCl for another 2 d. Afterwards, root elongation was measured. The sample without pretreatment was the control (Con). Values are mean  $\pm$  SE of three independent experiments with at least three replicates for each. Bars with different letters are significant different at  $p < 0.05$  according to Duncan's multiple range test.
